# Supplementary material
Source: PubMed Central journal article supplement (PMC2970721)
Supplement: NIHMS203800-supplement-supplement_1.pdf [file NIHMS203800-supplement-supplement_1.pdf]

**Supplement Table 1.** Age- and sex-adjusted Pearson correlation coefficient between all investigated meat-related variables in the PLCO Cancer Screening Trial participants (n =99,579)

|                                       | Red<br>meat | Processed<br>meat | Grilled/<br>BBQ | Pan-<br>fried | Oven-<br>broiled | Sautéed/<br>microw/<br>baked | Rare<br>done | Very-<br>well<br>done | OMA  | MeIQx | DiMeIQx | PhIP | B(a)P | Heme<br>Iron |
|---------------------------------------|-------------|-------------------|-----------------|---------------|------------------|------------------------------|--------------|-----------------------|------|-------|---------|------|-------|--------------|
| <b>Red meat</b>                       | 1.0         | 0.55              | 0.39            | 0.52          | 0.11             | 0.11                         | 0.39         | 0.39                  | 0.50 | 0.59  | 0.36    | 0.41 | 0.43  | 0.82         |
| <b>Processed<br/>meat</b>             | 0.55        | 1.0               | 0.21            | 0.39          | 0.08             | 0.08                         | 0.20         | 0.30                  | 0.31 | 0.37  | 0.20    | 0.24 | 0.25  | 0.60         |
| <b>Grilled/<br/>BBQ</b>               | 0.39        | 0.21              | 1.0             | 0.12          | -0.03            | 0.008                        | 0.45         | 0.47                  | 0.57 | 0.41  | 0.45    | 0.58 | 0.62  | 0.48         |
| <b>Pan-fried</b>                      | 0.52        | 0.39              | 0.12            | 1.0           | -0.08            | 0.004                        | 0.31         | 0.53                  | 0.49 | 0.70  | 0.38    | 0.28 | 0.21  | 0.48         |
| <b>Oven-<br/>Broiled</b>              | 0.11        | 0.08              | -0.03           | -0.08         | 1.0              | 0.04                         | 0.03         | -0.06                 | 0.04 | -0.05 | -0.07   | 0.21 | 0.006 | 0.13         |
| <b>Sautéed/<br/>microw/<br/>baked</b> | 0.11        | 0.08              | 0.008           | 0.004         | 0.04             | 1.0                          | 0.05         | -0.05                 | 0.02 | 0.03  | -0.08   | 0.04 | 0.02  | 0.15         |

|                           |      |      |      |      |       |       |      |      |      |      |      |      |      |      |
|---------------------------|------|------|------|------|-------|-------|------|------|------|------|------|------|------|------|
| <b>Rare done</b>          | 0.39 | 0.20 | 0.45 | 0.31 | 0.03  | 0.05  | 1.0  | 0.04 | 0.15 | 0.17 | 0.11 | 0.26 | 0.27 | 0.41 |
| <b>Very-well<br/>done</b> | 0.39 | 0.30 | 0.47 | 0.53 | -0.06 | -0.05 | 0.04 | 1.0  | 0.84 | 0.79 | 0.73 | 0.59 | 0.47 | 0.44 |
| <b>OMA</b>                | 0.50 | 0.31 | 0.57 | 0.49 | 0.04  | 0.02  | 0.15 | 0.84 | 1.0  | 0.83 | 0.78 | 0.82 | 0.59 | 0.62 |
| <b>MeIQx</b>              | 0.59 | 0.37 | 0.41 | 0.70 | -0.05 | 0.03  | 0.17 | 0.79 | 0.83 | 1.0  | 0.72 | 0.59 | 0.54 | 0.64 |
| <b>DiMeIQx</b>            | 0.36 | 0.20 | 0.45 | 0.38 | -0.07 | -0.08 | 0.11 | 0.73 | 0.78 | 0.72 | 1.0  | 0.59 | 0.44 | 0.43 |
| <b>PhIP</b>               | 0.41 | 0.24 | 0.58 | 0.28 | 0.21  | 0.04  | 0.26 | 0.59 | 0.82 | 0.59 | 0.59 | 1.0  | 0.61 | 0.55 |
| <b>B(a)P</b>              | 0.43 | 0.25 | 0.62 | 0.21 | 0.006 | 0.02  | 0.27 | 0.47 | 0.59 | 0.54 | 0.44 | 0.61 | 1.0  | 0.56 |
| <b>Heme Iron</b>          | 0.82 | 0.60 | 0.48 | 0.48 | 0.13  | 0.15  | 0.41 | 0.44 | 0.62 | 0.64 | 0.43 | 0.55 | 0.56 | 1.0  |

---
